# Supplementary material for: Hepatic steatosis does not cause insulin resistance in people with familial hypobetalipoproteinaemia
Source: Springer Nature journal article supplement (doi:10.1007/s00125-011-2157-x), 2011-05-05
Supplement: MOESM1 [file 8090024]

## Electronic supplementary material

**Table 1** Baseline characteristics of FHBL patients and controls

| Characteristic                   | FHBL ( <i>n</i> =7)           | Control ( <i>n</i> =7)        | <i>p</i> value |
|----------------------------------|-------------------------------|-------------------------------|----------------|
| Age (years)                      | 47 (22–61)<br>44±5.6          | 45 (22–60)<br>42±5            | NS             |
| BMI (kg/m <sup>2</sup> )         | 27 (22–32)<br>27±1.2          | 26 (20–36)<br>27±1.8          | NS             |
| WHR (cm)                         | 1.02 (0.97–1.05)<br>1.02±0.01 | 1.01 (0.94–1.12)<br>1.02±0.03 | NS             |
| Total cholesterol (mmol/l)       | 1.94 (1.39–2.81)<br>1.97±0.18 | 4.75 (3.47–5.23)<br>4.49±0.22 | <0.01          |
| Triacylglycerol (mmol/l)         | 0.14 (0.05–0.49)<br>0.20±0.06 | 0.76 (0.40–1.07)<br>0.73±0.08 | <0.01          |
| ApoB (g/l)                       | 0.24 (0.12–0.4)<br>0.24±0.04  | 0.83 (0.54–0.90)<br>0.78±0.05 | <0.01          |
| HDL (mmol/l)                     | 1.19 (0.7–1.53)<br>1.14±0.11  | 1.3 (0.79–1.83)<br>1.3±1.15   | NS             |
| HOMA index                       | 1.58 (0.21–2.35)<br>1.50±0.25 | 0.76 (0.23–1.58)<br>0.84±0.20 | NS             |
| Aspartate aminotransferase (U/l) | 39 (22–49)<br>37±4            | 28 (14–34)<br>25±3            | <0.05          |
| Alanine aminotransferase (U/l)   | 62 (22–106)<br>63±13          | 23 (10–32)<br>21±3            | 0.05           |
| C-reactive protein (mg/l)        | 1.4 (0.5–3.1)<br>1.6±0.4      | 1.0 (0.5–6.2)<br>1.6±0.8      | NS             |

Data are median (range) and mean±SEM
