# Supplementary material for: Hepatic steatosis does not cause insulin resistance in people with familial hypobetalipoproteinaemia
Source: Springer Nature journal article supplement (doi:10.1007/s00125-011-2157-x), 2011-05-05
Supplement: MOESM2 [file 8090024]

## Electronic supplementary material

**Table 2** Body fat composition

| Variable                                       | FHBL ( <i>n</i> =7) | Controls ( <i>n</i> =7) | <i>p</i> value |
|------------------------------------------------|---------------------|-------------------------|----------------|
| Body weight (kg)                               | 86 (70–110)         | 87 (71–114)             | NS             |
|                                                | 88±5                | 90±5                    |                |
| Body fat (%)                                   | 26 (19–30)          | 23 (12–35)              | NS             |
|                                                | 25±2                | 24±3                    |                |
| Lean body mass (kg)                            | 61 (49–77)          | 64 (58–67)              | NS             |
|                                                | 61±39               | 63±12                   |                |
| Peripheral fat mass (kg)                       | 8.4 (5.7–14.1)      | 8.6 (3.9–16.6)          | NS             |
|                                                | 8.8±10.3            | 9.5±15.7                |                |
| Trunk fat mass (kg)                            | 11.7 (6.1–16.7)     | 10.8 (3.6–19.9)         | NS             |
|                                                | 11.8±13.1           | 11.0±18.4               |                |
| Abdomen                                        |                     |                         |                |
| Subcutaneous adipose tissue (cm <sup>2</sup> ) | 189 (148–429)       | 203 (48–505)            | NS             |
|                                                | 233±404             | 236±531                 |                |
| Visceral adipose tissue (cm <sup>2</sup> )     | 124 (39–181)        | 107 (27–219)            | NS             |
|                                                | 128±175             | 115±237                 |                |
| Visceral:subcutaneous adipose tissue ratio     | 0.62 (0.26–1.19)    | 0.55 (0.22–1.08)        | NS             |
|                                                | 0.63±0.14           | 0.56±0.11               |                |

Data are median (range) and mean±SEM
