# Supplementary material for: Hepatic steatosis does not cause insulin resistance in people with familial hypobetalipoproteinaemia
Source: Springer Nature journal article supplement (doi:10.1007/s00125-011-2157-x), 2011-05-05
Supplement: MOESM3 [file 8090024]

**Electronic supplementary material**

**Table 3** Glucose and fat metabolism at baseline and during the clamp

| Variable                                                                                                             | Basal state                  |                              |                   | Clamp 1                        |                               |                   | Clamp 2                        |                               |                   |
|----------------------------------------------------------------------------------------------------------------------|------------------------------|------------------------------|-------------------|--------------------------------|-------------------------------|-------------------|--------------------------------|-------------------------------|-------------------|
|                                                                                                                      | FHBL                         | Control                      | <i>p</i><br>value | FHBL                           | Control                       | <i>p</i><br>value | FHBL                           | Control                       | <i>p</i><br>value |
| Glucose (mmol/l)                                                                                                     | 5.5 (4.2–5.6)<br>5.2±0.2     | 5.0 (4.0–5.5)<br>4.8±0.2     | NS                | 5.1 (4.8–5.2)<br>5.0±0.1       | 4.9 (4.6–5.1)<br>4.9±0.1      | NS                | 4.9 (4.7–5.2)<br>4.9±0.1       | 4.9 (4.8–5.3)<br>4.9±0.1      | NS                |
| Insulin (pmol/l)                                                                                                     | 53 (8–71)<br>44±9            | 24 (8–83)<br>32±10           | NS                | 199 (177–302)<br>230±19        | 162 (132–294)<br>195±26       | NS                | 615 (572–836)<br>641±36        | 504 (426–712)<br>541±45       | NS                |
| EGP ( $\mu\text{mol} [\text{kg FFM}]^{-1} \text{min}^{-1}$ )                                                         | 11.5 (10.1–13.2)<br>11.9±0.5 | 13.0 (11.4–14.0)<br>12.8±0.4 | NS                | 3.1 (1.5–5.2)<br>3.4±0.5       | 2.2 (1.3–6.4)<br>2.8±0.6      | NS                | – <sup>a</sup>                 | – <sup>a</sup>                |                   |
| $R_d$ ( $\mu\text{mol} [\text{kg FFM}]^{-1} \text{min}^{-1}$ )                                                       | –                            | –                            |                   | 22.4 (16.2–32.6)<br>22.9±2.1   | 22.5 (18.8–42.9)<br>26.0±3.3  | NS                | 57.5 (48.2–73.7)<br>57.3±3.1   | 65.0 (44.3–82.9)<br>63.2±5.9  | NS                |
| Insulin clearance (mU [m <sup>2</sup> body<br>surface area] <sup>-1</sup> min <sup>-1</sup> [pmol/l] <sup>-1</sup> ) | –                            | –                            |                   | 0.10 (0.07–0.11)<br>0.09±0.007 | 0.12 (0.07–0.15)<br>0.11±0.01 | NS                | 0.10 (0.07–0.10)<br>0.09±0.005 | 0.12 (0.08–0.14)<br>0.12±0.01 | NS                |
| Glucose oxidation<br>( $\mu\text{mol} [\text{kg FFM}]^{-1} \text{min}^{-1}$ )                                        | 6.8 (5.1–11.1)<br>7.7±0.8    | 9.1 (5.2–11.9)<br>9.3±0.8    | NS                | –                              | –                             |                   | 22.6 (16.4–25.7)<br>22.0±1.3   | 26.1 (16.9–37.1)<br>25.5±2.7  | NS                |
| NOGD<br>( $\mu\text{mol} [\text{kg FFM}]^{-1} \text{min}^{-1}$ )                                                     | 3.2 (2.1–8.1)<br>4.2±0.8     | 3.7 (0.0–6.3)<br>3.6±0.7     | NS                | –                              | –                             |                   | 33.1 (28.2–55.5)<br>35.4±3.5   | 42.0 (26.5–52.1)<br>37.8±3.7  | NS                |

| Variable                                                          | Basal state        |                     |                   | Clamp 1          |                  |                   | Clamp 2             |                     |                   |
|-------------------------------------------------------------------|--------------------|---------------------|-------------------|------------------|------------------|-------------------|---------------------|---------------------|-------------------|
|                                                                   | FHBL               | Control             | <i>p</i><br>value | FHBL             | Control          | <i>p</i><br>value | FHBL                | Control             | <i>p</i><br>value |
| REE (kJ/day)                                                      | 7,125 (6,113–9874) | 7,280 (6,653–8,786) | NS                | –                | –                |                   | 7,908 (6,515–9,945) | 7,862 (6,991–9,803) | NS                |
|                                                                   | 7,514±594          | 7,636±322           |                   |                  |                  |                   | 8,012±469           | 8,096±372           |                   |
| NEFA (mmol/l)                                                     | 0.47 (0.18–0.49)   | 0.40 (0.29–0.82)    | NS                | 0.08 (0.03–0.18) | 0.05 (0.03–0.18) | NS                | 0.03 (0.01–0.06)    | 0.01 (0.01–0.05)    | NS                |
|                                                                   | 0.41±0.04          | 0.50±0.08           |                   | 0.08±0.02        | 0.07±0.02        |                   | 0.03±0.01           | 0.02±0.01           |                   |
| Lipolysis (μmol kg <sup>-1</sup> min <sup>-1</sup> )              | 1.6 (1.5–1.9)      | 1.7 (1.2–2.5)       | NS                | 0.8 (0.4–1.0)    | 0.6 (0.4–1.1)    | NS                | 0.6 (0.3–0.9)       | 0.4 (0.3–0.8)       | NS                |
|                                                                   | 3.3±0.1            | 3.8±0.4             |                   | 1.0±0.1          | 0.9±0.2          |                   | 0.8±0.1             | 0.6±0.1             |                   |
| Fat oxidation<br>(μmol [kg FFM] <sup>-1</sup> min <sup>-1</sup> ) | 1.8 (1.2–2.1)      | 1.7 (1.0–1.9)       | NS                | –                | –                |                   | 0.6 (0.5–1.2)       | 0.4 (0.0–1.0)       | NS                |
|                                                                   | 1.7±0.1            | 1.6±0.1             |                   |                  |                  |                   | 0.7±0.1             | 0.4±0.2             |                   |

Data are median (range) and mean±SEM

To convert from μmol kg<sup>-1</sup> min<sup>-1</sup> to mg kg<sup>-1</sup> min<sup>-1</sup>, multiply by 0.18

<sup>a</sup>EGP was completely suppressed in both groups during high-dose insulin infusion

NOGD, non-oxidative glucose disposal
